# Supplementary material
Source: PubMed Central journal article supplement (PMC7163782)

## Supplementary Online Content

Dolladille C, Ederhy S, Sassier M, et al. Immune checkpoint inhibitor rechallenge after immune-related adverse events in patients with cancer. *JAMA Oncol*. Published online April 16, 2020. doi:10.1001/jamaoncol.2020.0726

**eTable 1.** Administrative Information (Country, Type of Report, Qualification of Reporter) and Clinical Characteristics of the ICI-Associated ICSRs Extracted from VigiBase® and Reporting at Least One irAE Up Until 1 September 2019

**eTable 2.** (A) Additional Characteristics of Rechallenged and Non-Rchallenged Cases After an irAE With At Least One ICI AND (B) Additional Factors Associated With the Recurrence of the Same irAE Among Informative Rechallenges

**eTable 3.** TTO of the Initial irAEs Associated With At Least One ICI in the Rechallenged (n=6,123) and the Non-Rchallenged ICSR Population (n=17,956)

**eTable 4.** Description of the 16,663 ICSRs With Anti-PD-1/PD-L1 Monotherapy Among the irAE Population

**eTable 5.** Description of the 4081 ICSRs With Anti-CTLA-4 Monotherapy Among the irAE Population

**eTable 6.** Description of the 3317 ICSRs With Combination Therapy Among the irAE Population

**eTable 7.** Comparison Between Informative and Non-Informative Rechallenges

**eTable 8.** Details About the Occurrence of a Different irAE (Different from the Initial One) After ICI Rechallenge

**eTable 9.** Time to Onset of the Initial irAE in the Recurrence (n=130) and the Non-Recurrence ICSR Populations (n=322) After ICI Rechallenge

**eTable 10.** Informative Rechallenges With an Anti-PD-1/PD-L1 Monotherapy (n=370)

**eTable 11.** Informative Rechallenges With an Anti-CTLA-4 Monotherapy (n=22)

**eTable 12.** Informative Rechallenges With Combination Therapy (n=60)

**eTable 13.** Details About the ICI Regimen Used (Combination Therapy, Anti-PD-1/PD-L1 monotherapy, anti-CTLA-4 monotherapy) to rechallenge after an irAE Under Combination Therapy Among Informative Rechallenges

**eAppendix 1.** Medical Dictionary for Regulatory Activities (MedDRA, v21.1) Preferred Terms Used to Identify Immune Related Adverse Events in Vigibase®

**eAppendix 2.** Description of the Vigibase® Extract Case Level Data

**eAppendix 3.** Statistical Analysis Supplement

**eFigure 1.** Flow Chart of Cases Selection in VigiBase®

**eFigure 2.** Rate of Recurrence According to the Initial Immune-Related Adverse Event and the Initial ICI Regimen

This supplementary material has been provided by the authors to give readers additional information about their work.

**eTable 1.** Administrative Information (Country, Type of Report, Qualification of Reporter) and Clinical Characteristics of the ICI-Associated ICSRs Extracted from VigiBase® and Reporting at Least One irAE Up Until 1 September 2019

| <b>irAE population</b>                         | <b>Value</b>   | <b>N</b> |
|------------------------------------------------|----------------|----------|
| Number of cases                                | 24,079         |          |
| Year                                           |                | 24,079   |
| 2006                                           | 1 (0·0%)       |          |
| 2008                                           | 3 (0·0%)       |          |
| 2009                                           | 13 (0·1%)      |          |
| 2010                                           | 8 (0·0%)       |          |
| 2011                                           | 63 (0·3%)      |          |
| 2012                                           | 295 (1·2%)     |          |
| 2013                                           | 416 (1·7%)     |          |
| 2014                                           | 685 (2·8%)     |          |
| 2015                                           | 1281 (5·3%)    |          |
| 2016                                           | 1870 (7·8%)    |          |
| 2017                                           | 4247 (17·6%)   |          |
| 2018                                           | 7245 (30·1%)   |          |
| 2019                                           | 7952 (33·0%)   |          |
| Region                                         |                | 24,079   |
| African                                        | 4 (0·0%)       |          |
| Americas                                       | 8891 (36·9%)   |          |
| South-East Asia                                | 39 (0·2%)      |          |
| European                                       | 8671 (36·0%)   |          |
| Eastern Mediterranean                          | 22 (0·1%)      |          |
| Western Pacific                                | 6452 (26·8%)   |          |
| Type of report                                 |                | 24,079   |
| Spontaneous                                    | 16,121 (67·0%) |          |
| Report from study                              | 7725 (32·1%)   |          |
| Other                                          | 117 (0·5%)     |          |
| Not available to sender (unknown)              | 1 (0·0%)       |          |
| Post marketing surveillance/special monitoring | 1 (0·0%)       |          |
| Missing                                        | 114 (0·5%)     |          |
| Reporter                                       |                | 24,079   |
| Physician                                      | 13,445 (55·8%) |          |
| Pharmacist                                     | 1574 (6·5%)    |          |
| Other health professional                      | 5318 (22·1%)   |          |
| Lawyer                                         | 26 (0·1%)      |          |
| Consumer or other non-health professional      | 3065 (12·7%)   |          |
| Missing                                        | 651 (2·7%)     |          |
| Age group                                      |                | 16,384   |
| <45 years                                      | 1223 (7·5%)    |          |
| 45–64 years                                    | 6088 (37·2%)   |          |
| 65–74 years                                    | 5779 (35·3%)   |          |

|                                                                                                                                                                                                                                                                           |                |        |
|---------------------------------------------------------------------------------------------------------------------------------------------------------------------------------------------------------------------------------------------------------------------------|----------------|--------|
| >75 years                                                                                                                                                                                                                                                                 | 3294 (20.1%)   |        |
| Female sex                                                                                                                                                                                                                                                                | 8048 (36.5%)   | 22,078 |
| Type of cancer                                                                                                                                                                                                                                                            |                | 20,556 |
| Brain                                                                                                                                                                                                                                                                     | 56 (0.3%)      |        |
| Digestive                                                                                                                                                                                                                                                                 | 651 (3.2%)     |        |
| Gynaecological                                                                                                                                                                                                                                                            | 292 (1.4%)     |        |
| Head and neck                                                                                                                                                                                                                                                             | 416 (2.0%)     |        |
| Haematology                                                                                                                                                                                                                                                               | 417 (2.0%)     |        |
| Lung                                                                                                                                                                                                                                                                      | 8455 (41.1%)   |        |
| Melanoma                                                                                                                                                                                                                                                                  | 7474 (36.4%)   |        |
| Prostate                                                                                                                                                                                                                                                                  | 101 (0.5%)     |        |
| Renal                                                                                                                                                                                                                                                                     | 1387 (6.7%)    |        |
| Skin                                                                                                                                                                                                                                                                      | 55 (0.3%)      |        |
| Urinary                                                                                                                                                                                                                                                                   | 542 (2.6%)     |        |
| Not otherwise classified                                                                                                                                                                                                                                                  | 821 (4.0%)     |        |
| ICI                                                                                                                                                                                                                                                                       |                | 24,079 |
| Anti-PD-1/PD-L1 monotherapy                                                                                                                                                                                                                                               | 16,663 (69.2%) |        |
| Anti-CTLA-4 alone                                                                                                                                                                                                                                                         | 4081 (16.9%)   |        |
| Combination therapy                                                                                                                                                                                                                                                       | 3317 (13.8%)   |        |
| Type of initial irAE                                                                                                                                                                                                                                                      |                | 24,079 |
| Adrenal                                                                                                                                                                                                                                                                   | 1189 (4.9%)    |        |
| Arthritis                                                                                                                                                                                                                                                                 | 1863 (7.7%)    |        |
| Colitis                                                                                                                                                                                                                                                                   | 7098 (29.5%)   |        |
| Diabetes                                                                                                                                                                                                                                                                  | 756 (3.1%)     |        |
| Haematological                                                                                                                                                                                                                                                            | 360 (1.5%)     |        |
| Hepatitis                                                                                                                                                                                                                                                                 | 1917 (8.0%)    |        |
| Hypophysitis                                                                                                                                                                                                                                                              | 1489 (6.2%)    |        |
| Mucositis                                                                                                                                                                                                                                                                 | 509 (2.1%)     |        |
| Myocarditis                                                                                                                                                                                                                                                               | 447 (1.9%)     |        |
| Myositis                                                                                                                                                                                                                                                                  | 607 (2.5%)     |        |
| Nephritis                                                                                                                                                                                                                                                                 | 276 (1.1%)     |        |
| Neurological                                                                                                                                                                                                                                                              | 1667 (6.9%)    |        |
| Pancreatitis                                                                                                                                                                                                                                                              | 451 (1.9%)     |        |
| Pneumonitis                                                                                                                                                                                                                                                               | 5289 (22.0%)   |        |
| Skin                                                                                                                                                                                                                                                                      | 633 (2.6%)     |        |
| Thyroiditis                                                                                                                                                                                                                                                               | 2756 (11.4%)   |        |
| Uveitis                                                                                                                                                                                                                                                                   | 269 (1.1%)     |        |
| Vasculitis                                                                                                                                                                                                                                                                | 64 (0.3%)      |        |
| ICSR with follow-up                                                                                                                                                                                                                                                       | 10,762 (44.7%) | 24,079 |
| Serious initial irAE                                                                                                                                                                                                                                                      | 20,190 (85.6%) | 23,578 |
| Fatal initial irAE                                                                                                                                                                                                                                                        | 2680 (11.4%)   | 23,580 |
| CTLA-4, cytotoxic T-lymphocyte antigen 4; ICI, immune-checkpoint inhibitor; ICSR, individual case safety report; irAE, immune-related adverse event; PD-1, programmed-death-1; PD-L1, programmed-death-ligand-1. A case can have multiple initial irAEs and cancer types. |                |        |

**eTable 2.** (A) Additional Characteristics of Rechallenged and Non-Rechallenged Cases After an irAE With At Least One ICI AND (B) Additional Factors Associated With the Recurrence of the Same irAE Among Informative Rechallenges

| <b>A.</b>                                                                                                                                  |                                  |          |                                     |          |            |              |
|--------------------------------------------------------------------------------------------------------------------------------------------|----------------------------------|----------|-------------------------------------|----------|------------|--------------|
| Initial irAE patients                                                                                                                      | Rechallenged after irAE          | n avail. | No rechallenge after irAE           | n avail. |            |              |
| Number of cases                                                                                                                            | 6123                             |          | 17,956                              |          |            |              |
| Age group                                                                                                                                  |                                  | 3597     |                                     | 12,787   |            |              |
| <45 years                                                                                                                                  | 255 (7.1%)                       |          | 968 (7.6%)                          |          |            |              |
| 45–64 years                                                                                                                                | 1259 (35.0%)                     |          | 4829 (37.8%)                        |          |            |              |
| 65–74 years                                                                                                                                | 1346 (37.4%)                     |          | 4433 (34.7%)                        |          |            |              |
| >75 years                                                                                                                                  | 737 (20.5%)                      |          | 2557 (20.0%)                        |          |            |              |
| Female sex                                                                                                                                 | 2012 (36.1%)                     | 5572     | 6036 (36.6%)                        | 16,506   |            |              |
| Updated case                                                                                                                               | 3033 (49.5%)                     | 6123     | 7729 (43.0%)                        | 17,956   |            |              |
| <b>B.</b>                                                                                                                                  |                                  |          |                                     |          |            |              |
|                                                                                                                                            | Recurrence after ICI rechallenge | n avail. | No recurrence after ICI rechallenge | n avail. | Odds ratio | 95% CI       |
| Age group                                                                                                                                  |                                  | 100      |                                     | 271      |            |              |
| <45 years                                                                                                                                  | 1 (1.0%)                         |          | 18 (6.6%)                           |          | 1          | Ref          |
| 45–64 years                                                                                                                                | 30 (30.0%)                       |          | 93 (34.3%)                          |          | 5.81       | (0.74–45.34) |
| 65–74 years                                                                                                                                | 49 (49.0%)                       |          | 106 (39.1%)                         |          | 8.32       | (1.08–64.11) |
| >75 years                                                                                                                                  | 20 (20.0%)                       |          | 54 (19.9%)                          |          | 6.67       | (0.83–53.25) |
| Female sex                                                                                                                                 | 43 (34.4%)                       | 125      | 119 (37.0%)                         | 322      | 0.89       | (0.58–1.38)  |
| Updated case                                                                                                                               | 92 (70.8%)                       | 130      | 203 (63.0%)                         | 322      | 1.42       | (0.91–2.2)   |
| ICI: immune-checkpoint inhibitor; irAE, immune-related adverse event; n avail.: number of cases with available information; Ref: reference |                                  |          |                                     |          |            |              |

**eTable 3.** TTO of the Initial irAEs Associated With At Least One ICI in the Rechallenged (n=6,123) and the Non-Rechallenged ICSR Population (n=17,956)

| Type of initial irAE | Rechallenged ICSR population |               |                                   | Non-rechallenged ICSR population |               |                                   | p value |
|----------------------|------------------------------|---------------|-----------------------------------|----------------------------------|---------------|-----------------------------------|---------|
|                      | n                            | TTO available | Time to initial irAE onset (days) | n                                | TTO available | Time to initial irAE onset (days) |         |
| Adrenal              | 374                          | 123 (33%)     | 108 (67–181)                      | 815                              | 298 (37%)     | 112 (62–180)                      | 0.78    |
| Arthritis            | 491                          | 115 (23%)     | 70 (22–154)                       | 1372                             | 330 (24%)     | 63 (20–170)                       | 0.56    |
| Colitis              | 1743                         | 559 (32%)     | 53 (22–106)                       | 5355                             | 1734 (32%)    | 51 (24–105)                       | 0.92    |
| Diabetes             | 245                          | 65 (27%)      | 130 (53–283)                      | 511                              | 151 (30%)     | 92 (36–194)                       | 0.06    |
| Haematological       | 92                           | 26 (28%)      | 53 (22–143)                       | 268                              | 88 (33%)      | 57 (26–130)                       | 0.85    |
| Hepatitis            | 471                          | 139 (30%)     | 43 (26–96)                        | 1446                             | 503 (35%)     | 42 (23–86)                        | 0.61    |
| Hypophysitis         | 353                          | 91 (26%)      | 84 (48–156)                       | 1136                             | 279 (25%)     | 77 (45–139)                       | 0.29    |
| Mucositis            | 134                          | 54 (40%)      | 70 (29–157)                       | 375                              | 119 (32%)     | 56 (15–130)                       | 0.47    |
| Myocarditis          | 102                          | 23 (23%)      | 28 (18–77)                        | 345                              | 106 (31%)     | 28 (15–65)                        | 0.78    |
| Myositis             | 152                          | 38 (25%)      | 28 (18–42)                        | 455                              | 152 (33%)     | 28 (18–41)                        | 0.98    |
| Nephritis            | 78                           | 16 (21%)      | 70 (47–140)                       | 198                              | 52 (26%)      | 68 (42–115)                       | 0.60    |
| Neurological         | 422                          | 83 (20%)      | 35 (19–76)                        | 1245                             | 351 (28%)     | 42 (18–89)                        | 0.50    |
| Pancreatitis         | 118                          | 38 (32%)      | 94 (58–208)                       | 333                              | 91 (27%)      | 58 (28–196)                       | 0.16    |
| Pneumonitis          | 1286                         | 512 (40%)     | 52 (18–129)                       | 4003                             | 1972 (49%)    | 46 (16–110)                       | 0.07    |
| Skin                 | 155                          | 45 (29%)      | 71 (32–233)                       | 478                              | 153 (32%)     | 57 (23–208)                       | 0.57    |
| Thyroiditis          | 778                          | 366 (47%)     | 56 (29–103)                       | 1978                             | 861 (44%)     | 51 (27–98)                        | 0.09    |
| Uveitis              | 97                           | 33 (34%)      | 113 (29–156)                      | 172                              | 72 (42%)      | 48 (17–101)                       | 0.06    |
| Vasculitis           | 16                           | 3 (19%)       | 48 (32–48)                        | 48                               | 10 (21%)      | 42 (20–65)                        | 0.93    |

ICI, immune-checkpoint inhibitor; ICSR, individual case safety report; irAE, immune-related adverse event; TTO, time to onset.

**eTable 4.** Description of the 16,663 ICSRs With Anti-PD-1/PD-L1 Monotherapy Among the irAE Population

|                      | Rechallenged after irAE | n    | No rechallenge after irAE | n      |
|----------------------|-------------------------|------|---------------------------|--------|
| Number of cases      | 4360                    |      | 12,303                    |        |
| Age group            |                         | 2704 |                           | 8653   |
| <45 years            | 119 (4.4%)              |      | 457 (5.3%)                |        |
| 45–64 years          | 909 (33.6%)             |      | 3004 (34.7%)              |        |
| 65–74 years          | 1058 (39.1%)            |      | 3230 (37.3%)              |        |
| >75 years            | 618 (22.9%)             |      | 1962 (22.7%)              |        |
| Female sex           | 1388 (34.7%)            | 3999 | 4059 (35.4%)              | 11,471 |
| Type of initial irAE |                         | 4360 |                           | 12,303 |
| Adrenal              | 275 (6.3%)              |      | 504 (4.1%)                |        |
| Arthritis            | 402 (9.2%)              |      | 1136 (9.2%)               |        |
| Colitis              | 869 (19.9%)             |      | 2496 (20.3%)              |        |
| Diabetes             | 215 (4.9%)              |      | 383 (3.1%)                |        |
| Haematological       | 69 (1.6%)               |      | 196 (1.6%)                |        |
| Hepatitis            | 278 (6.4%)              |      | 838 (6.8%)                |        |
| Hypophysitis         | 136 (3.1%)              |      | 281 (2.3%)                |        |
| Mucositis            | 111 (2.5%)              |      | 329 (2.7%)                |        |
| Myocarditis          | 73 (1.7%)               |      | 270 (2.2%)                |        |
| Myositis             | 113 (2.6%)              |      | 365 (3.0%)                |        |
| Nephritis            | 59 (1.4%)               |      | 160 (1.3%)                |        |
| Neurological         | 307 (7.0%)              |      | 909 (7.4%)                |        |
| Pancreatitis         | 76 (1.7%)               |      | 227 (1.8%)                |        |
| Pneumonitis          | 1157 (26.5%)            |      | 3622 (29.4%)              |        |
| Skin                 | 121 (2.8%)              |      | 366 (3.0%)                |        |
| Thyroiditis          | 620 (14.2%)             |      | 1535 (12.5%)              |        |
| Uveitis              | 72 (1.7%)               |      | 120 (1.0%)                |        |
| Vasculitis           | 11 (0.3%)               |      | 36 (0.3%)                 |        |
| ICSR with follow-up  | 2277 (52.2%)            | 4360 | 5818 (47.3%)              | 12,303 |

|                                                                                                                                                                                                                                   |              |      |                |        |
|-----------------------------------------------------------------------------------------------------------------------------------------------------------------------------------------------------------------------------------|--------------|------|----------------|--------|
| Serious initial irAE                                                                                                                                                                                                              | 3779 (86.7%) | 4360 | 10,079 (83.3%) | 12,101 |
| Fatal initial irAE                                                                                                                                                                                                                | 483 (11.1%)  | 4360 | 1499 (12.4%)   | 12,102 |
| ICSR, individual case safety report; irAE, immune-related adverse event; PD-1, programmed-death-1; PD-L1, programmed-death-ligand-1. A case can have multiple initial irAEs (counts of initial irAEs exceed the number of cases). |              |      |                |        |



**eTable 5.** Description of the 4081 ICSRs With Anti-CTLA-4 Monotherapy Among the irAE Population

|                                                                                                                                                                                                                                | <b>Rechallenged after irAE</b> | <b>n</b> | <b>No rechallenge after irAE</b> | <b>n</b> |
|--------------------------------------------------------------------------------------------------------------------------------------------------------------------------------------------------------------------------------|--------------------------------|----------|----------------------------------|----------|
| Number of cases                                                                                                                                                                                                                | 791                            |          | 3290                             |          |
| Age group                                                                                                                                                                                                                      |                                | 441      |                                  | 2304     |
| <45 years                                                                                                                                                                                                                      | 65 (14.7%)                     |          | 283 (12.3%)                      |          |
| 45–64 years                                                                                                                                                                                                                    | 172 (39.0%)                    |          | 966 (41.9%)                      |          |
| 65–74 years                                                                                                                                                                                                                    | 133 (30.2%)                    |          | 677 (29.4%)                      |          |
| >75 years                                                                                                                                                                                                                      | 71 (16.1%)                     |          | 378 (16.4%)                      |          |
| Female sex                                                                                                                                                                                                                     | 286 (40.5%)                    | 707      | 1054 (37.6%)                     | 2806     |
| Type of initial irAE                                                                                                                                                                                                           |                                | 791      |                                  | 3290     |
| Adrenal                                                                                                                                                                                                                        | 42 (5.3%)                      |          | 167 (5.1%)                       |          |
| Arthritis                                                                                                                                                                                                                      | 28 (3.5%)                      |          | 105 (3.2%)                       |          |
| Colitis                                                                                                                                                                                                                        | 506 (64.0%)                    |          | 1925 (58.5%)                     |          |
| Diabetes                                                                                                                                                                                                                       | 4 (0.5%)                       |          | 16 (0.5%)                        |          |
| Haematological                                                                                                                                                                                                                 | 7 (0.9%)                       |          | 26 (0.8%)                        |          |
| Hepatitis                                                                                                                                                                                                                      | 43 (5.4%)                      |          | 261 (7.9%)                       |          |
| Hypophysitis                                                                                                                                                                                                                   | 123 (15.5%)                    |          | 626 (19.0%)                      |          |
| Mucositis                                                                                                                                                                                                                      | 4 (0.5%)                       |          | 15 (0.5%)                        |          |
| Myocarditis                                                                                                                                                                                                                    | 2 (0.3%)                       |          | 15 (0.5%)                        |          |
| Myositis                                                                                                                                                                                                                       | 2 (0.3%)                       |          | 16 (0.5%)                        |          |
| Nephritis                                                                                                                                                                                                                      | 2 (0.3%)                       |          | 12 (0.4%)                        |          |
| Neurological                                                                                                                                                                                                                   | 34 (4.3%)                      |          | 158 (4.8%)                       |          |
| Pancreatitis                                                                                                                                                                                                                   | 13 (1.6%)                      |          | 39 (1.2%)                        |          |
| Pneumonitis                                                                                                                                                                                                                    | 19 (2.4%)                      |          | 112 (3.4%)                       |          |
| Skin                                                                                                                                                                                                                           | 16 (2.0%)                      |          | 66 (2.0%)                        |          |
| Thyroiditis                                                                                                                                                                                                                    | 29 (3.7%)                      |          | 147 (4.5%)                       |          |
| Uveitis                                                                                                                                                                                                                        | 8 (1.0%)                       |          | 23 (0.7%)                        |          |
| Vasculitis                                                                                                                                                                                                                     | 0 (0.0%)                       |          | 7 (0.2%)                         |          |
| ICSR with follow-up                                                                                                                                                                                                            | 261 (33.0%)                    | 791      | 936 (28.4%)                      | 3290     |
| Serious initial irAE                                                                                                                                                                                                           | 661 (83.6%)                    | 791      | 2602 (84.5%)                     | 3081     |
| Fatal initial irAE                                                                                                                                                                                                             | 65 (8.2%)                      | 791      | 281 (9.1%)                       | 3081     |
| <small>CTLA-4, cytotoxic T-lymphocyte antigen 4; ICSR, individual case safety report; irAE, immune-related adverse event. A case can have multiple initial irAEs (counts of initial irAEs exceed the number of cases).</small> |                                |          |                                  |          |

**eTable 6.** Description of the 3317 ICSRs With Combination Therapy Among the irAE Population

|                      | <b>Rechallenged after irAE</b> | <b>n</b> | <b>No rechallenge after irAE</b> | <b>n</b> |
|----------------------|--------------------------------|----------|----------------------------------|----------|
| Number of cases      | 972                            |          | 2345                             |          |
| Age group            |                                | 452      |                                  | 1825     |
| <45 years            | 71 (15.7%)                     |          | 228 (12.5%)                      |          |
| 45–64 years          | 178 (39.4%)                    |          | 859 (47.1%)                      |          |
| 65–74 years          | 155 (34.3%)                    |          | 526 (28.8%)                      |          |
| >75 years            | 48 (10.6%)                     |          | 212 (11.6%)                      |          |
| Female sex           | 338 (39.0%)                    | 866      | 921 (41.6%)                      | 2215     |
| Type of initial irAE |                                | 972      |                                  | 2345     |
| Adrenal              | 57 (5.9%)                      |          | 143 (6.1%)                       |          |
| Arthritis            | 61 (6.3%)                      |          | 129 (5.5%)                       |          |
| Colitis              | 370 (38.1%)                    |          | 930 (39.7%)                      |          |
| Diabetes             | 26 (2.7%)                      |          | 112 (4.8%)                       |          |
| Haematological       | 16 (1.6%)                      |          | 46 (2.0%)                        |          |
| Hepatitis            | 152 (15.6%)                    |          | 340 (14.5%)                      |          |
| Hypophysitis         | 94 (9.7%)                      |          | 229 (9.8%)                       |          |
| Mucositis            | 20 (2.1%)                      |          | 29 (1.2%)                        |          |
| Myocarditis          | 27 (2.8%)                      |          | 59 (2.5%)                        |          |
| Myositis             | 37 (3.8%)                      |          | 72 (3.1%)                        |          |
| Nephritis            | 17 (1.7%)                      |          | 26 (1.1%)                        |          |
| Neurological         | 83 (8.5%)                      |          | 174 (7.4%)                       |          |
| Pancreatitis         | 30 (3.1%)                      |          | 66 (2.8%)                        |          |
| Pneumonitis          | 112 (11.5%)                    |          | 265 (11.3%)                      |          |
| Skin                 | 18 (1.9%)                      |          | 45 (1.9%)                        |          |
| Thyroiditis          | 130 (13.4%)                    |          | 293 (12.5%)                      |          |
| Uveitis              | 17 (1.7%)                      |          | 29 (1.2%)                        |          |
| Vasculitis           | 5 (0.5%)                       |          | 5 (0.2%)                         |          |
| ICSR with follow-up  | 495 (50.9%)                    | 972      | 966 (41.2%)                      | 2345     |
| Serious initial irAE | 904 (93.0%)                    | 972      | 2148 (95.3%)                     | 2255     |
| Fatal initial irAE   | 95 (9.8%)                      | 972      | 255 (11.3%)                      | 2256     |

ICSR, individual case safety report; irAE, immune-related adverse event. A case can have multiple initial irAEs (counts of initial irAEs exceed the number of cases).

**eTable 7.** Comparison Between Informative and Non-Informative Rechallenges

Non-informative rechallenges refers to cases where the rechallenge effect is unknown.

| Rechallenged irAE patients                                                                                                                                                                                                                                                                                    | Informative rechallenges | n   | Non-informative rechallenges | n    |
|---------------------------------------------------------------------------------------------------------------------------------------------------------------------------------------------------------------------------------------------------------------------------------------------------------------|--------------------------|-----|------------------------------|------|
| Number of cases                                                                                                                                                                                                                                                                                               | 452                      |     | 5671                         |      |
| Age group                                                                                                                                                                                                                                                                                                     |                          | 371 |                              | 3226 |
| <45 years                                                                                                                                                                                                                                                                                                     | 19 (5.1%)                |     | 236 (7.3%)                   |      |
| 45–64 years                                                                                                                                                                                                                                                                                                   | 123 (33.2%)              |     | 1136 (35.2%)                 |      |
| 65–74 years                                                                                                                                                                                                                                                                                                   | 155 (41.8%)              |     | 1191 (36.9%)                 |      |
| >75 years                                                                                                                                                                                                                                                                                                     | 74 (19.9%)               |     | 663 (20.6%)                  |      |
| Female sex                                                                                                                                                                                                                                                                                                    | 162 (36.2%)              | 447 | 1850 (36.1%)                 | 5125 |
| ICI                                                                                                                                                                                                                                                                                                           |                          | 452 |                              | 5671 |
| PD-1/PD-L1 monotherapy                                                                                                                                                                                                                                                                                        | 370 (81.9%)              |     | 3990 (70.4%)                 |      |
| CTLA-4 monotherapy                                                                                                                                                                                                                                                                                            | 22 (4.9%)                |     | 769 (13.6%)                  |      |
| Combination therapy                                                                                                                                                                                                                                                                                           | 60 (13.3%)               |     | 912 (16.1%)                  |      |
| Reaction                                                                                                                                                                                                                                                                                                      |                          | 452 |                              | 5671 |
| Adrenal                                                                                                                                                                                                                                                                                                       | 40 (8.8%)                |     | 334 (5.9%)                   |      |
| Arthritis                                                                                                                                                                                                                                                                                                     | 29 (6.4%)                |     | 462 (8.1%)                   |      |
| Colitis                                                                                                                                                                                                                                                                                                       | 125 (27.7%)              |     | 1620 (28.6%)                 |      |
| Diabetes                                                                                                                                                                                                                                                                                                      | 13 (2.9%)                |     | 232 (4.1%)                   |      |
| Haematological                                                                                                                                                                                                                                                                                                | 10 (2.2%)                |     | 82 (1.4%)                    |      |
| Hypophysitis                                                                                                                                                                                                                                                                                                  | 23 (5.1%)                |     | 330 (5.8%)                   |      |
| Liver                                                                                                                                                                                                                                                                                                         | 33 (7.3%)                |     | 440 (7.8%)                   |      |
| Mucositis                                                                                                                                                                                                                                                                                                     | 5 (1.1%)                 |     | 130 (2.3%)                   |      |
| Myocarditis                                                                                                                                                                                                                                                                                                   | 3 (0.7%)                 |     | 99 (1.7%)                    |      |
| Myositis                                                                                                                                                                                                                                                                                                      | 9 (2.0%)                 |     | 143 (2.5%)                   |      |
| Nephritis                                                                                                                                                                                                                                                                                                     | 8 (1.8%)                 |     | 70 (1.2%)                    |      |
| Neurological                                                                                                                                                                                                                                                                                                  | 19 (4.2%)                |     | 405 (7.1%)                   |      |
| Pancreatitis                                                                                                                                                                                                                                                                                                  | 14 (3.1%)                |     | 105 (1.9%)                   |      |
| Pneumonitis                                                                                                                                                                                                                                                                                                   | 103 (22.8%)              |     | 1185 (20.9%)                 |      |
| Skin                                                                                                                                                                                                                                                                                                          | 16 (3.5%)                |     | 139 (2.5%)                   |      |
| Thyroiditis                                                                                                                                                                                                                                                                                                   | 61 (13.5%)               |     | 718 (12.7%)                  |      |
| Uveitis                                                                                                                                                                                                                                                                                                       | 11 (2.4%)                |     | 86 (1.5%)                    |      |
| Vasculitis                                                                                                                                                                                                                                                                                                    | 1 (0.2%)                 |     | 15 (0.3%)                    |      |
| ICSR with follow-up                                                                                                                                                                                                                                                                                           | 295 (65.3%)              | 452 | 2738 (48.3%)                 | 5671 |
| Serious initial irAE                                                                                                                                                                                                                                                                                          | 415 (91.8%)              | 452 | 4929 (86.9%)                 | 5671 |
| Fatal initial irAE                                                                                                                                                                                                                                                                                            | 21 (4.6%)                | 452 | 622 (11.0%)                  | 5671 |
| CTLA-4, cytotoxic T-lymphocyte antigen 4; ICI, immune-checkpoint inhibitor; ICSR, individual case safety report; irAE, immune-related adverse event; PD-1, programmed-death-1; PD-L1, programmed-death-ligand-1. A case can have multiple initial irAEs (counts of initial irAEs exceed the number of cases). |                          |     |                              |      |

**eTable 8.** Details About the Occurrence of a Different irAE (Different from the Initial One) After ICI Rechallenge

| Type of initial irAE | Total number of different irAEs occurring after ICI rechallenge | Number of different irAEs   |                         |                     |
|----------------------|-----------------------------------------------------------------|-----------------------------|-------------------------|---------------------|
|                      |                                                                 | Anti-PD-1/PD-L1 monotherapy | Anti-CTLA-4 monotherapy | Combination therapy |
| Adrenal              | 0                                                               | 0                           | 0                       | 0                   |
| Arthritis            | 3                                                               | 1                           | 0                       | 2                   |
| Colitis              | 10                                                              | 4                           | 0                       | 6                   |
| Diabetes             | 0                                                               | 0                           | 0                       | 0                   |
| Haematological       | 0                                                               | 0                           | 0                       | 0                   |
| Hepatitis            | 2                                                               | 0                           | 0                       | 2                   |
| Hypophysitis         | 0                                                               | 0                           | 0                       | 0                   |
| Mucositis            | 0                                                               | 0                           | 0                       | 0                   |
| Myocarditis          | 0                                                               | 0                           | 0                       | 0                   |
| Myositis             | 0                                                               | 0                           | 0                       | 0                   |
| Nephritis            | 0                                                               | 0                           | 0                       | 0                   |
| Neurological         | 1                                                               | 1                           | 0                       | 0                   |
| Pancreatitis         | 3                                                               | 2                           | 0                       | 1                   |
| Pneumonitis          | 2                                                               | 0                           | 0                       | 2                   |
| Skin                 | 2                                                               | 2                           | 0                       | 0                   |
| Thyroiditis          | 3                                                               | 2                           | 0                       | 1                   |
| Uveitis              | 0                                                               | 0                           | 0                       | 0                   |
| Vasculitis           | 0                                                               | 0                           | 0                       | 0                   |

CTLA-4, cytotoxic T-lymphocyte antigen 4; ICI, immune-checkpoint inhibitor; irAE, immune-related adverse event; PD-1, programmed-death-1; PD-L1, programmed-death-ligand-1.

| Type of initial irAE | irAE recurrence population |               |                                   | Non-irAE recurrence population |               |                                   | p value |
|----------------------|----------------------------|---------------|-----------------------------------|--------------------------------|---------------|-----------------------------------|---------|
|                      | n                          | TTO available | Time to initial irAE onset (days) | n                              | TTO available | Time to initial irAE onset (days) |         |
| Adrenal              | 5                          | 1 (20%)       | 109                               | 35                             | 15 (43%)      | 111 (82–174)                      | 1       |
| Arthritis            | 13                         | 10 (77%)      | 83 (48–214)                       | 16                             | 10 (62%)      | 92 (17–161)                       | 0·6     |
| Colitis              | 45                         | 29 (64%)      | 83 (34–174)                       | 78                             | 41 (53%)      | 58 (27–89)                        | 0·13    |
| Diabetes             | 0                          | –             | –                                 | 13                             | 6 (46%)       | 52 (40–271)                       | –       |
| Haematological       | 3                          | 1 (33%)       | 103                               | 7                              | 1 (14%)       | 12                                | 1       |
| Hepatitis            | 9                          | 4 (44%)       | 28 (12–48)                        | 22                             | 11 (50%)      | 71 (42–91)                        | 0·07    |
| Hypophysitis         | 6                          | 4 (67%)       | 54 (48–84)                        | 17                             | 4 (24%)       | 154 (67–227)                      | 0·49    |
| Mucositis            | 1                          | 1 (100%)      | 50                                | 3                              | 1 (33%)       | 1                                 | 1       |
| Myocarditis          | 0                          | –             | –                                 | 3                              | –             | –                                 | –       |
| Myositis             | 2                          | –             | –                                 | 7                              | 2 (29%)       | 40 (40–40)                        | –       |
| Nephritis            | 4                          | 2 (50%)       | 73 (46–100)                       | 4                              | 1 (25%)       | 183                               | 0·67    |
| Neurological         | 1                          | 1 (100%)      | 31 (31–31)                        | 16                             | 6 (38%)       | 44 (22–68)                        | 1       |
| Pancreatitis         | 2                          | 1 (50%)       | 130                               | 11                             | 7 (64%)       | 105 (64–138)                      | 0·75    |
| Pneumonitis          | 34                         | 21 (62%)      | 88 (58–178)                       | 67                             | 36 (54%)      | 44 (20–90)                        | 0·03    |
| Skin                 | 6                          | 3 (50%)       | 91 (67–102)                       | 10                             | 6 (60%)       | 100 (50–260)                      | 0·9     |
| Thyroiditis          | 10                         | 4 (40%)       | 107 (76–132)                      | 50                             | 32 (64%)      | 39 (22–65)                        | 0·08    |
| Uveitis              | 1                          | –             | –                                 | 10                             | 5 (50%)       | 133 (44–154)                      | –       |
| Vasculitis           | 1                          | 1 (100%)      | 48                                | 0                              | –             | –                                 | –       |

ICI, immune-checkpoint inhibitor; ICSR, individual case safety report; irAE, immune-related adverse event; TTO, time to onset.

**eTable 9.** Time to Onset of the Initial irAE in the Recurrence (n=130) and the Non-Recurrence ICSR Populations (n=322) After ICI Rechallenge

**eTable 10.** Informative Rechallenges With an Anti-PD-1/PD-L1 Monotherapy (n=370)

| <b>Rechallenged patients</b> | <b>Recurrence of the initial irAE</b> | <b>n</b> | <b>No recurrence of the initial irAE</b> | <b>n</b> |
|------------------------------|---------------------------------------|----------|------------------------------------------|----------|
| Number of cases              | 105                                   |          | 265                                      |          |
| Age group                    |                                       | 83       |                                          | 238      |
| <45 years                    | 0 (0.0%)                              |          | 12 (5.0%)                                |          |
| 45–64 years                  | 25 (30.1%)                            |          | 76 (31.9%)                               |          |
| 65–74 years                  | 41 (49.4%)                            |          | 99 (41.6%)                               |          |
| >75 years                    | 17 (20.5%)                            |          | 51 (21.4%)                               |          |
| Female sex                   | 31 (31.0%)                            | 100      | 94 (35.5%)                               | 265      |
| Type of initial irAE         |                                       | 105      |                                          | 265      |
| Adrenal                      | 5 (4.8%)                              |          | 31 (11.7%)                               |          |
| Arthritis                    | 11 (10.5%)                            |          | 14 (5.3%)                                |          |
| Colitis                      | 34 (32.4%)                            |          | 54 (20.4%)                               |          |
| Diabetes                     | 0 (0.0%)                              |          | 13 (4.9%)                                |          |
| Haematological               | 2 (1.9%)                              |          | 5 (1.9%)                                 |          |
| Hepatitis                    | 7 (6.7%)                              |          | 11 (4.2%)                                |          |
| Hypophysitis                 | 3 (2.9%)                              |          | 8 (3.0%)                                 |          |
| Mucositis                    | 2 (1.9%)                              |          | 3 (1.1%)                                 |          |
| Myocarditis                  | 0 (0.0%)                              |          | 3 (1.1%)                                 |          |
| Myositis                     | 1 (1.0%)                              |          | 5 (1.9%)                                 |          |
| Nephritis                    | 4 (3.8%)                              |          | 3 (1.1%)                                 |          |
| Neurological                 | 3 (2.9%)                              |          | 13 (4.9%)                                |          |
| Pancreatitis                 | 2 (1.9%)                              |          | 8 (3.0%)                                 |          |
| Pneumonitis                  | 30 (28.6%)                            |          | 66 (24.9%)                               |          |

|                      |            |     |             |     |
|----------------------|------------|-----|-------------|-----|
| Skin                 | 6 (5.7%)   |     | 9 (3.4%)    |     |
| Thyroiditis          | 9 (8.6%)   |     | 38 (14.3%)  |     |
| Uveitis              | 1 (1.0%)   |     | 9 (3.4%)    |     |
| Vasculitis           | 1 (1.0%)   |     | 0 (0.0%)    |     |
| ICSR with follow-up  | 76 (72.4%) | 105 | 172 (64.9%) | 265 |
| Serious initial irAE | 95 (90.5%) | 105 | 245 (92.5%) | 265 |
| Fatal initial irAE   | 7 (6.7%)   | 105 | 9 (3.4%)    | 265 |

irAE, immune-related adverse event; PD-1, programmed-death-1; PD-L1, programmed-death-ligand-1. A case can have multiple initial irAEs (counts of initial irAEs exceed the number of cases).

**eTable 11.** Informative Rechallenges With an Anti-CTLA-4 Monotherapy (n=22)

| <b>Rechallenged patients</b> | <b>Recurrence of the initial irAE</b> | <b>n</b> | <b>No recurrence of the initial irAE</b> | <b>n</b> |
|------------------------------|---------------------------------------|----------|------------------------------------------|----------|
| Number of cases              | 7                                     |          | 15                                       |          |
| Age group                    |                                       | 7        |                                          | 11       |
| <45 years                    | 0 (0·0%)                              |          | 4 (36·4%)                                |          |
| 45–64 years                  | 1 (14·3%)                             |          | 4 (36·4%)                                |          |
| 65–74 years                  | 3 (42·9%)                             |          | 1 (9·1%)                                 |          |
| >75 years                    | 3 (42·9%)                             |          | 2 (18·2%)                                |          |
| Female sex                   | 4 (57·1%)                             | 7        | 7 (46·7%)                                | 15       |
| Type of initial irAE         |                                       | 7        |                                          | 15       |
| Adrenal                      | 0 (0·0%)                              |          | 2 (13·3%)                                |          |
| Arthritis                    | 0 (0·0%)                              |          | 0 (0·0%)                                 |          |
| Colitis                      | 4 (57·1%)                             |          | 6 (40·0%)                                |          |
| Diabetes                     | 0 (0·0%)                              |          | 0 (0·0%)                                 |          |
| Haematological               | 0 (0·0%)                              |          | 0 (0·0%)                                 |          |
| Hypophysitis                 | 2 (28·6%)                             |          | 4 (26·7%)                                |          |
| Hepatitis                    | 1 (14·3%)                             |          | 1 (6·7%)                                 |          |
| Mucositis                    | 0 (0·0%)                              |          | 0 (0·0%)                                 |          |
| Myocarditis                  | 0 (0·0%)                              |          | 0 (0·0%)                                 |          |
| Myositis                     | 0 (0·0%)                              |          | 0 (0·0%)                                 |          |
| Nephritis                    | 0 (0·0%)                              |          | 0 (0·0%)                                 |          |
| Neurological                 | 0 (0·0%)                              |          | 1 (6·7%)                                 |          |
| Pancreatitis                 | 0 (0·0%)                              |          | 0 (0·0%)                                 |          |
| Pneumonitis                  | 0 (0·0%)                              |          | 0 (0·0%)                                 |          |
| Skin                         | 0 (0·0%)                              |          | 1 (6·7%)                                 |          |



|                                                                                                                                                                                                                 |           |   |            |    |
|-----------------------------------------------------------------------------------------------------------------------------------------------------------------------------------------------------------------|-----------|---|------------|----|
| Thyroiditis                                                                                                                                                                                                     | 0 (0·0%)  |   | 2 (13·3%)  |    |
| Uveitis                                                                                                                                                                                                         | 0 (0·0%)  |   | 0 (0·0%)   |    |
| Vasculitis                                                                                                                                                                                                      | 0 (0·0%)  |   | 0 (0·0%)   |    |
| ICSR with follow-up                                                                                                                                                                                             | 3 (42·9%) | 7 | 2 (13·3%)  | 15 |
| Serious initial irAE                                                                                                                                                                                            | 6 (85·7%) | 7 | 11 (73·3%) | 15 |
| Fatal initial irAE                                                                                                                                                                                              | 0 (0·0%)  | 7 | 1 (6·7%)   | 15 |
| CLTA-4, cytotoxic T-lymphocyte antigen 4; ICSR, individual case safety report; irAE, immune-related adverse event. A case can have multiple initial irAEs (counts of initial irAEs exceed the number of cases). |           |   |            |    |

**eTable 12.** Informative Rechallenges With Combination Therapy (n=60)

| <b>Rechallenged patients</b> | <b>Recurrence of the initial irAE</b> | <b>n</b> | <b>No recurrence of the initial irAE</b> | <b>n</b> |
|------------------------------|---------------------------------------|----------|------------------------------------------|----------|
| Number of cases              | 18                                    |          | 42                                       |          |
| Age group                    |                                       | 10       |                                          | 22       |
| <45 years                    | 1 (10.0%)                             |          | 2 (9.1%)                                 |          |
| 45–64 years                  | 4 (40.0%)                             |          | 13 (59.1%)                               |          |
| 65–74 years                  | 5 (50.0%)                             |          | 6 (27.3%)                                |          |
| >75 years                    | 0 (0.0%)                              |          | 1 (4.5%)                                 |          |
| Female sex                   | 8 (44.4%)                             | 18       | 18 (42.9%)                               | 42       |
| Type of initial irAE         |                                       | 18       |                                          | 42       |
| Adrenal                      | 0 (0.0%)                              |          | 2 (4.8%)                                 |          |
| Arthritis                    | 2 (11.1%)                             |          | 2 (4.8%)                                 |          |
| Colitis                      | 9 (50.0%)                             |          | 18 (42.9%)                               |          |
| Diabetes                     | 0 (0.0%)                              |          | 0 (0.0%)                                 |          |
| Haematological               | 1 (5.6%)                              |          | 2 (4.8%)                                 |          |
| Hypophysitis                 | 3 (16.7%)                             |          | 10 (23.8%)                               |          |
| Hepatitis                    | 1 (5.6%)                              |          | 5 (11.9%)                                |          |
| Mucositis                    | 0 (0.0%)                              |          | 0 (0.0%)                                 |          |
| Myocarditis                  | 0 (0.0%)                              |          | 0 (0.0%)                                 |          |
| Myositis                     | 1 (5.6%)                              |          | 2 (4.8%)                                 |          |
| Nephritis                    | 0 (0.0%)                              |          | 1 (2.4%)                                 |          |
| Neurological                 | 0 (0.0%)                              |          | 2 (4.8%)                                 |          |
| Pancreatitis                 | 1 (5.6%)                              |          | 3 (7.1%)                                 |          |
| Pneumonitis                  | 6 (33.3%)                             |          | 1 (2.4%)                                 |          |
| Skin                         | 0 (0.0%)                              |          | 0 (0.0%)                                 |          |
| Thyroiditis                  | 2 (11.1%)                             |          | 10 (23.8%)                               |          |
| Uveitis                      | 0 (0.0%)                              |          | 1 (2.4%)                                 |          |
| Vasculitis                   | 0 (0.0%)                              |          | 0 (0.0%)                                 |          |
| ICSR with follow-up          | 13 (72.2%)                            | 18       | 29 (69.0%)                               | 42       |
| Serious initial irAE         | 17 (94.4%)                            | 18       | 41 (97.6%)                               | 42       |
| Fatal initial irAE           | 1 (5.6%)                              | 18       | 3 (7.1%)                                 | 42       |

ICSR, individual case safety report; irAE, immune-related adverse event. A case can have multiple initial irAEs (counts of initial irAEs exceed the number of cases).

**eTable 13.** Details About the ICI Regimen Used (Combination Therapy, Anti-PD-1/PD-L1 monotherapy, anti-CTLA-4 monotherapy) to rechallenge after an irAE Under Combination Therapy Among Informative Rechallenges

| Rechallenge regimen | Any | Anti-PD-1/PD-L1 |   |                        | Anti-CTLA-4    |   |                        | Combination therapy |   |                        |
|---------------------|-----|-----------------|---|------------------------|----------------|---|------------------------|---------------------|---|------------------------|
|                     |     | N               | N | Reccurence (same irAE) | Different irAE | N | Reccurence (same irAE) | Different irAE      | N | Reccurence (same irAE) |
| Adrenal             | 2   | 0               | 0 | 0                      | 1              | 0 | 0                      | 1                   | 0 | 0                      |
| Arthritis           | 4   | 2               | 1 | 0                      | 0              | 0 | 0                      | 2                   | 1 | 2                      |
| Colitis             | 26  | 10              | 5 | 2                      | 3              | 1 | 2                      | 13                  | 2 | 2                      |
| Diabetes            | 0   | 0               | 0 | 0                      | 0              | 0 | 0                      | 0                   | 0 | 0                      |
| Haematological      | 3   | 2               | 1 | 0                      | 0              | 0 | 0                      | 1                   | 0 | 0                      |
| Hepatitis           | 11  | 3               | 0 | 1                      | 2              | 0 | 0                      | 6                   | 1 | 1                      |
| Hypophysitis        | 6   | 3               | 1 | 0                      | 1              | 0 | 0                      | 2                   | 0 | 0                      |
| Mucositis           | 0   | 0               | 0 | 0                      | 0              | 0 | 0                      | 0                   | 0 | 0                      |
| Myocarditis         | 0   | 0               | 0 | 0                      | 0              | 0 | 0                      | 0                   | 0 | 0                      |
| Myositis            | 3   | 1               | 1 | 0                      | 0              | 0 | 0                      | 2                   | 0 | 0                      |
| Nephritis           | 1   | 0               | 0 | 0                      | 0              | 0 | 0                      | 1                   | 0 | 0                      |
| Neurological        | 2   | 0               | 0 | 0                      | 1              | 0 | 0                      | 1                   | 0 | 0                      |
| Pancreatitis        | 4   | 0               | 0 | 0                      | 0              | 0 | 0                      | 4                   | 1 | 1                      |
| Pneumonitis         | 7   | 3               | 2 | 1                      | 0              | 0 | 0                      | 4                   | 4 | 1                      |
| Skin                | 0   | 0               | 0 | 0                      | 0              | 0 | 0                      | 0                   | 0 | 0                      |
| Thyroiditis         | 11  | 1               | 0 | 0                      | 3              | 1 | 0                      | 7                   | 0 | 1                      |
| Uveitis             | 1   | 0               | 0 | 0                      | 0              | 0 | 0                      | 1                   | 0 | 0                      |
| Vasculitis          | 0   | 0               | 0 | 0                      | 0              | 0 | 0                      | 0                   | 0 | 0                      |

CLTA-4, anti-cytotoxic T-lymphocyte antigen 4; ICI, immune-checkpoint inhibitor; ICSR, individual case safety report; irAE, immune-related adverse event; PD-1, programmed-death-1; PD-L1, programmed-death-ligand-1.

**eAppendix 1.** Medical Dictionary for Regulatory Activities (MedDRA, v21.1) Preferred Terms Used to Identify Immune Related Adverse Events in Vigibase®

|                                        |
|----------------------------------------|
| <b>Adrenal</b>                         |
| Addison's disease                      |
| Adrenal insufficiency                  |
| Adrenocortical insufficiency acute     |
| Adrenocorticotropic hormone deficiency |
| Secondary adrenocortical insufficiency |
| <b>Arthritis</b>                       |
| Arthritis                              |
| Autoimmune arthritis                   |
| Polyarthritis                          |
| Rheumatoid arthritis                   |
| <b>Colitis</b>                         |
| Autoimmune colitis                     |
| Colitis microscopic                    |
| Diarrhoea                              |
| Diarrhoea haemorrhagic                 |
| Duodenitis                             |
| Enteritis                              |
| Enterocolitis                          |
| Enterocolitis haemorrhagic             |
| Ulcerative gastritis                   |
| <b>Diabetes</b>                        |
| Diabetic ketoacidosis                  |
| Fulminant type 1 diabetes mellitus     |
| Type 1 diabetes mellitus               |
| <b>Hematological</b>                   |
| Autoimmune haemolytic anaemia          |
| Haemolytic anaemia                     |
| Haemophagocytic lymphohistiocytosis    |
| Immune thrombocytopenic purpura        |
| <b>Hypophysitis</b>                    |
| Hypophysitis                           |
| Hypopituitarism                        |
| Hypothalamo-pituitary disorder         |
| Lymphocytic hypophysitis               |
| Pituitary enlargement                  |
| <b>Liver</b>                           |
| Acute hepatic failure                  |
| Autoimmune hepatitis                   |
| Drug-induced liver injury              |
| Hepatic failure                        |
| Hepatitis                              |
| Hepatitis acute                        |
| Hepatotoxicity                         |

|                                       |
|---------------------------------------|
| <b>Mucositis</b>                      |
| Dry mouth                             |
| Mucosal inflammation                  |
| <b>Myocarditis</b>                    |
| Autoimmune myocarditis                |
| Myocarditis                           |
| <b>Myositis</b>                       |
| Necrotising myositis                  |
| Polymyositis                          |
| Rhabdomyolysis                        |
| <b>Nephritis</b>                      |
| Nephritis                             |
| Glomerulonephritis                    |
| <b>Neurological</b>                   |
| Autoimmune neuropathy                 |
| Demyelinating polyneuropathy          |
| Encephalitis                          |
| Encephalitis autoimmune               |
| Encephalopathy                        |
| Guillain-Barre syndrome               |
| Limbic encephalitis                   |
| Meningitis                            |
| Meningitis aseptic                    |
| Myasthenia gravis                     |
| Myasthenia gravis crisis              |
| Myasthenic syndrome                   |
| Neuropathy peripheral                 |
| Ocular myasthenia                     |
| Peripheral motor neuropathy           |
| Peripheral sensorimotor neuropathy    |
| Peripheral sensory neuropathy         |
| <b>Oesophagitis</b>                   |
| Eosinophilic oesophagitis             |
| <b>Pancreatitis</b>                   |
| Autoimmune pancreatitis               |
| Pancreatitis                          |
| <b>Pneumonitis</b>                    |
| Interstitial lung disease             |
| Pneumonitis                           |
| Organising pneumonia                  |
| <b>Skin</b>                           |
| Acute febrile neutrophilic dermatosis |
| Dermatitis                            |
| Dermatitis psoriasiform               |
| Drug eruption                         |
| Granulomatosis with polyangiitis      |
| Pemphigoid                            |

|                        |
|------------------------|
| Skin toxicity          |
| Toxic skin eruption    |
| <b>Thyroiditis</b>     |
| Autoimmune thyroiditis |
| Hyperthyroidism        |
| Hypothyroidism         |
| Thyroiditis            |
| <b>Uveitis</b>         |
| Autoimmune uveitis     |
| Uveitis                |
| <b>Vasculitis</b>      |
| Vasculitis             |
| Vasculitis necrotising |

## **eAppendix 2.** Description of the Vigibase® Extract Case Level Data

The Vigibase® extract case level data is a relational database. It contains a deduplicated version of the dataset. The demographic table includes data on the year of reporting, the patient age and sex, the country of reporting. The outcome table provides information on seriousness and death. The adverse drug reaction table includes data on each adverse drug reaction of ICSRs, coded with MedDRA codes. The medications table includes data on each medication of ICSRs, coded with medicinal product Id (drug name, dose, route of administration, frequency, dechallenge and rechallenge). The time to onset is precalculated for each pair of medication and reaction in ICSRs in a link table. Indication of the medications is provided in an indication table.

### eAppendix 3. Statistical Analysis Supplement

The rate of recurrence was calculated as follows:

$$\text{rate of recurrence} = \frac{\text{number of cases experiencing recurrence}}{\text{number of informative rechallenges}} * 100$$

This rate is different of an incidence rate which evaluates the proportion of an adverse event with a drug. The incidence rate cannot be computed in VigiBase® since the denominator (the number of patients exposed to a drug) is not known. Disproportionality analysis was performed to explore the factors associated with the recurrence in a secondary analysis. The common use of disproportionality analysis is evaluating the magnitude of the over-reporting of an adverse event with a drug compared with the other adverse events and the other drugs. Several measurements can be used, including the reporting Odds-Ratio (OR) which is computed as follows

| Reporting OR to investigate associations between a drug of interest and an adverse event of interest (common use) |               |                           |                      |
|-------------------------------------------------------------------------------------------------------------------|---------------|---------------------------|----------------------|
| Exposure                                                                                                          | Adverse event | Adverse event of interest | Other adverse events |
| Drug of interest                                                                                                  |               | a                         | b                    |
| Other drugs                                                                                                       |               | c                         | d                    |

$$\text{reporting OR} = \frac{a * d}{b * c}$$

However, in the present study, the disproportionality analysis was used in a different setting, to evaluate to factors associated with the recurrence rather than with the drug.

| Reporting OR to investigate factors associated with the recurrence |                                 |                                                       |                                                         |
|--------------------------------------------------------------------|---------------------------------|-------------------------------------------------------|---------------------------------------------------------|
| Recurrence status                                                  | Factors (adverse event, sex...) | Factor is present (e.g. colitis reported in the case) | Factor is absent (e.g. no colitis reported in the case) |
| Recurrence of irAE                                                 |                                 | a                                                     | b                                                       |
| No recurrence of irAE                                              |                                 | c                                                     | d                                                       |

This is formally the chi-square-like contingency table to compute reporting OR. It is also possible to use a logistic regression model using independent and dependent variables to estimate coefficients and OR. The formula would be

$$\text{recurrence status} \sim \text{factor in the case (e.g. colitis is reported)}$$

There can be more than one independent variables in a multivariable logistic regression model, although it requires to access to individual case data. In our study, we computed uni- and multivariable reporting OR to investigate the factors associated with the recurrence. Confidence intervals were computed with the estimates and standard errors of the logistic regression model. A variable selection process was undertaken, as the number of events was insufficient to keep all variables. Stepwise procedure using the Akaike Information Criteria (AIC) was used to identify the most contributive variables to the multivariate logistic regression model.



**eFigure 1.** Flow Chart of Cases Selection in VigiBase®

ICI, immune-checkpoint inhibitor; irAE, immune-related adverse event

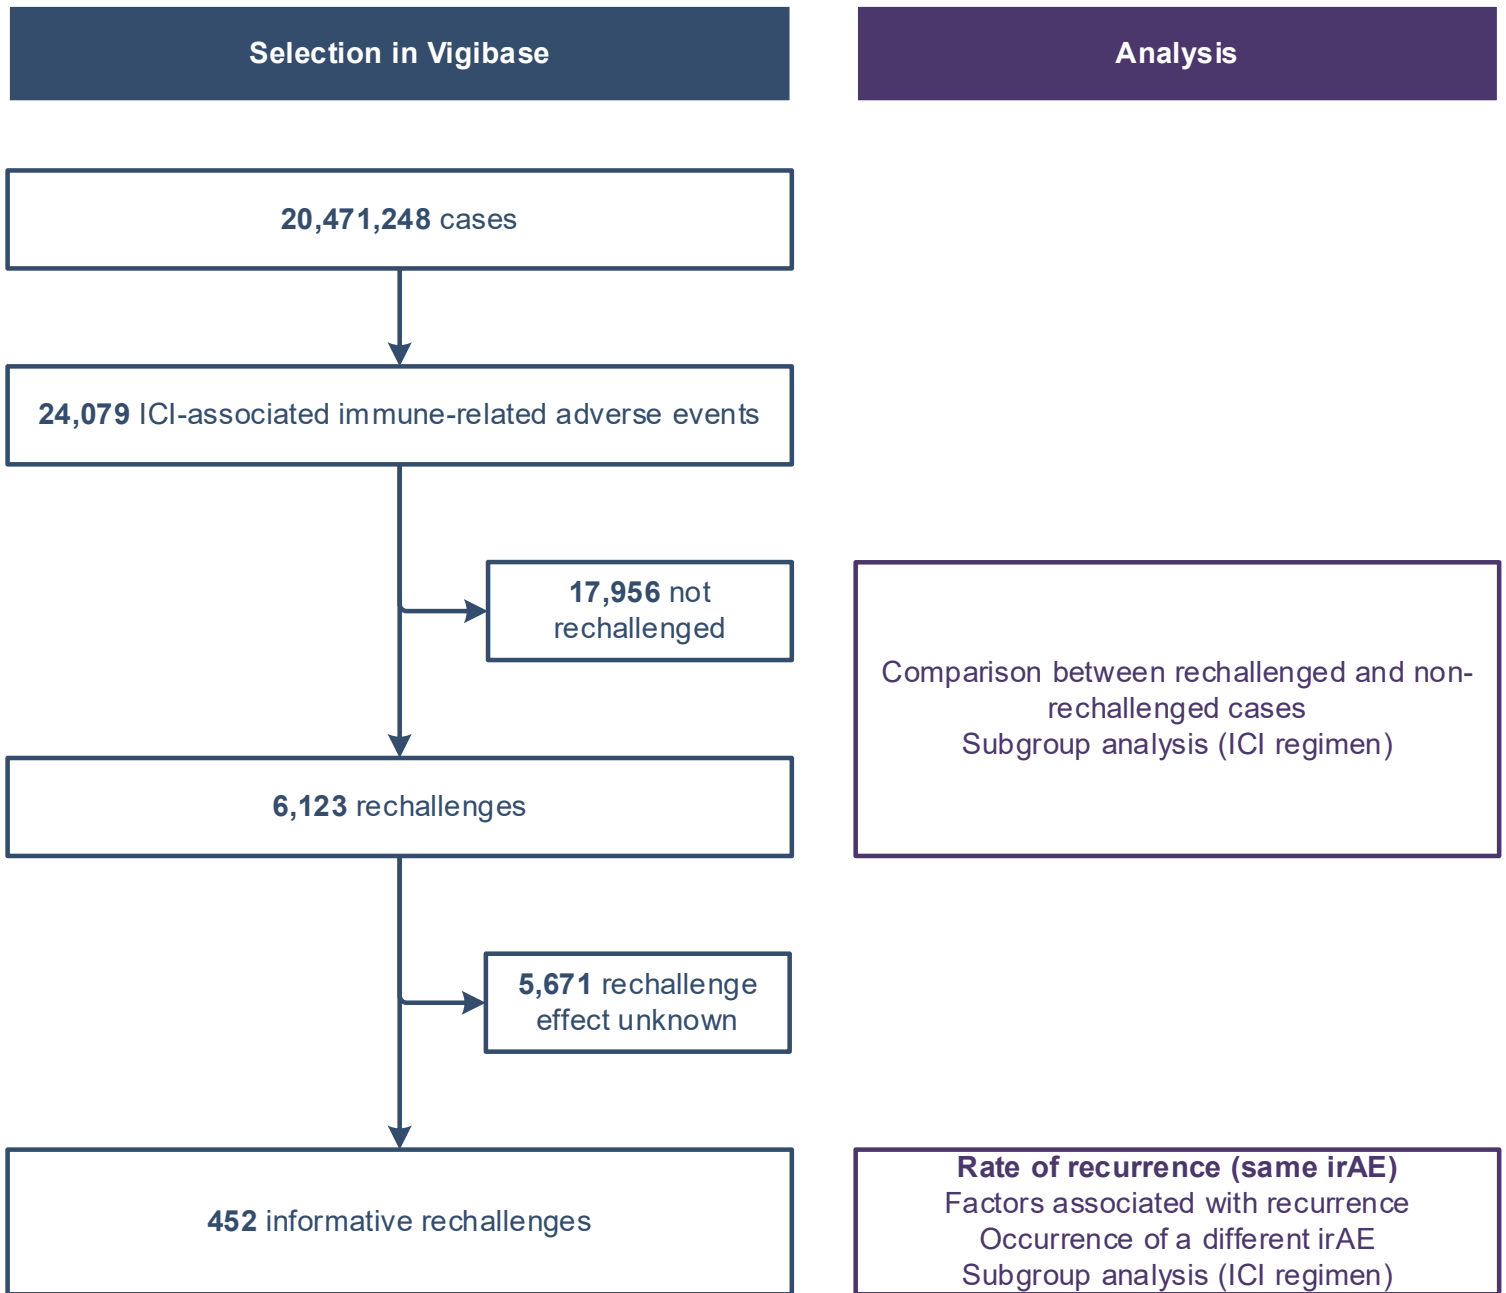

**eFigure 2.** Rate of Recurrence According to the Initial Immune-Related Adverse Event and the Initial ICI Regimen

Anti-PD-1, anti-programmed-death-1; anti-PD-L1, anti-programmed-death-ligand-1; anti-CTLA-4, anti-cytotoxic T-lymphocyte antigen 4; ICI, immune-checkpoint inhibitor. Only adverse events with  $\geq 10$  rechallenges are shown.

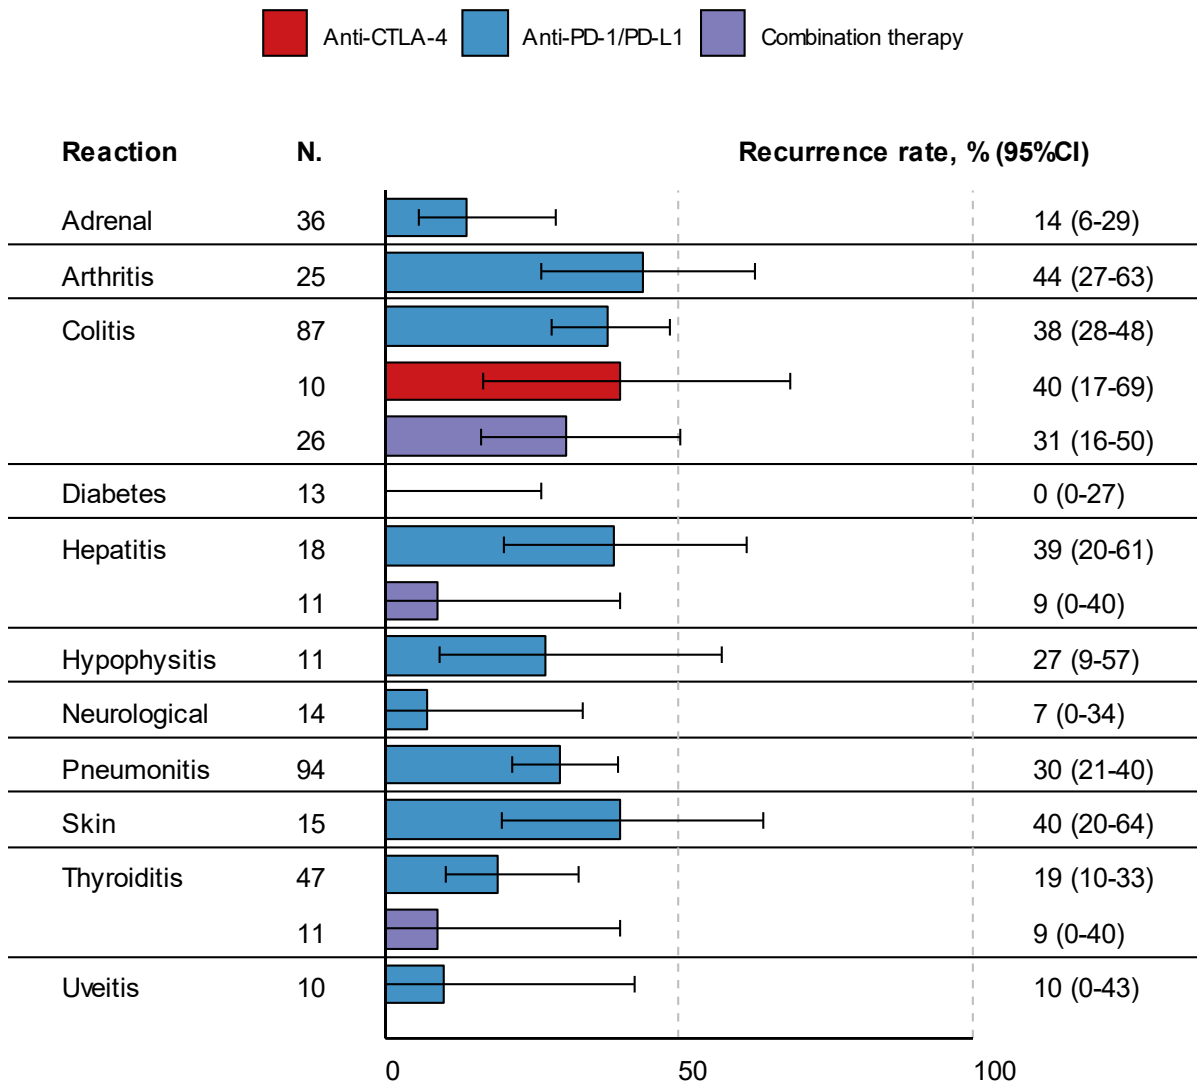

Supplement: jamaoncol-6-865-s001.pdf [file jamaoncol-6-865-s001.pdf]
